# Supplementary material for: Photobiomodulation Therapy in the Management of Oral Lichen Planus: A Systematic Review and Meta-Analysis
Source: PubMed Central journal article supplement (PMC11479744; doi:10.1055/s-0044-1782213), 2024-05-14
Supplement: 10-1055-s-0044-1782213-s2383050.pdf [file 10-1055-s-0044-1782213-s2383050.pdf]

**Supplementary Table S1** Search strategy in PubMed

| Search no. | Searches                                                                                                                                     | Hits   |
|------------|----------------------------------------------------------------------------------------------------------------------------------------------|--------|
| 1          | ("low level laser therapy" OR "laser phototherapy" OR "photobiomodulation therapy" OR "laser therapy" OR "laser treatment" OR "diode laser") | 61,732 |
| 2          | ("oral potentially malignant disorder" OR "oral precancer" OR "oral premalignant" OR "lichen planus" OR "leukoplakia")                       | 18,989 |
| 3          | 1 AND 2                                                                                                                                      | 318    |

**Supplementary Table S2** Search strategy in Scopus

| Search no. | Searches                                                                                                                                                   | Hits   |
|------------|------------------------------------------------------------------------------------------------------------------------------------------------------------|--------|
| 1          | TITLE-ABS-KEY ("low level laser therapy" OR "laser phototherapy" OR "photobiomodulation therapy" OR "laser therapy" OR "laser treatment" OR "diode laser") | 93,616 |
| 2          | TITLE-ABS-KEY ("oral potentially malignant disorder" OR "oral precancer" OR "oral premalignant" OR "lichen planus" OR "leukoplakia")                       | 27,090 |
| 3          | 1 AND 2                                                                                                                                                    | 435    |

**Supplementary Table S3** Search strategy in Cochrane

| Search no. | Searches                                                                                                                                     | Hits |
|------------|----------------------------------------------------------------------------------------------------------------------------------------------|------|
| 1          | ("low level laser therapy" OR "laser phototherapy" OR "photobiomodulation therapy" OR "laser therapy" OR "laser treatment" OR "diode laser") | 114  |
| 2          | ("oral potentially malignant disorder" OR "oral precancer" OR "oral premalignant" OR "lichen planus" OR "leukoplakia")                       | 6    |
| 3          | 1 AND 2                                                                                                                                      | 4    |

**Supplementary Table S4** Risk of bias for RCTs

|                                             | Random sequence generation (selection bias) | Allocation concealment (selection bias) | Blinding of participants and personnel (performance bias) | Blinding of outcome assessment (detection bias) (objective measures) | Incomplete outcome data addressed (attrition bias) | Selective reporting (reporting bias) | Other bias | Quality |
|---------------------------------------------|---------------------------------------------|-----------------------------------------|-----------------------------------------------------------|----------------------------------------------------------------------|----------------------------------------------------|--------------------------------------|------------|---------|
| Dillenburg et al (2014) <sup>21</sup>       | Low                                         | Low                                     | High                                                      | High                                                                 | Low                                                | Unclear                              | Unclear    | Poor    |
| Kazancioglu and Erisen (2015) <sup>24</sup> | Low                                         | Low                                     | Unclear                                                   | Low                                                                  | Low                                                | Unclear                              | Unclear    | Fair    |
| Jajam et al (2011) <sup>25</sup>            | Low                                         | Unclear                                 | Low                                                       | Low                                                                  | High                                               | Low                                  | Unclear    | Fair    |
| Bhatt et al (2022) <sup>27</sup>            | Low                                         | Low                                     | Low                                                       | High                                                                 | Low                                                | Low                                  | Unclear    | Fair    |
| Ferri et al (2021) <sup>28</sup>            | Low                                         | Low                                     | Low                                                       | High                                                                 | Hign                                               | Unclear                              | Unclear    | Poor    |
| Mirza et al (2018) <sup>22</sup>            | Low                                         | Low                                     | High                                                      | Low                                                                  | Low                                                | Unclear                              | Unclear    | Poor    |
| Jain et al (2021) <sup>26</sup>             | Low                                         | Low                                     | Low                                                       | Low                                                                  | Low                                                | Unclear                              | Unclear    | High    |

Abbreviations: RCTs, randomized controlled trials.

**Supplementary Table S5** Risk of bias for observational studies

|                                           | Selection                        |                                 |                       |                        | Exposure                                                                   |                           |                                                     | Quality          |      |
|-------------------------------------------|----------------------------------|---------------------------------|-----------------------|------------------------|----------------------------------------------------------------------------|---------------------------|-----------------------------------------------------|------------------|------|
|                                           | Is the case definition adequate? | Representativeness of the cases | Selection of controls | Definition of controls | Comparability                                                              | Ascertainment of exposure | Same method of ascertainment for cases and controls |                  |      |
| El Shenawy and Eldin (2015) <sup>23</sup> | *                                |                                 |                       |                        | Comparability of cases and controls on the basis of the design or analysis |                           | *                                                   | Nonresponse rate | Poor |

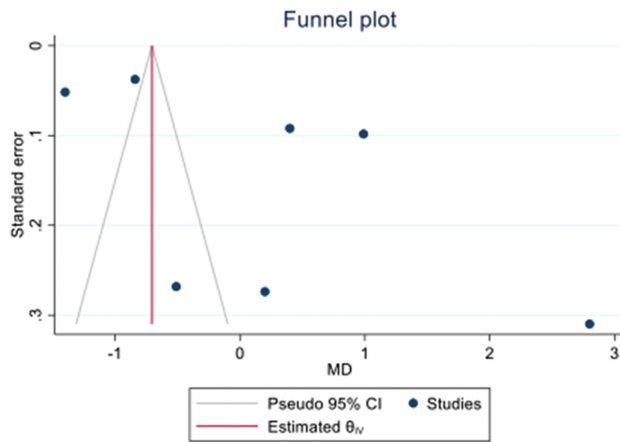

**Supplementary Fig. S1** Funnel plot asymmetry test for the efficacy of photobiomodulation therapy on pain score (visual analog scale). CI, confidence interval; MD, mean difference.

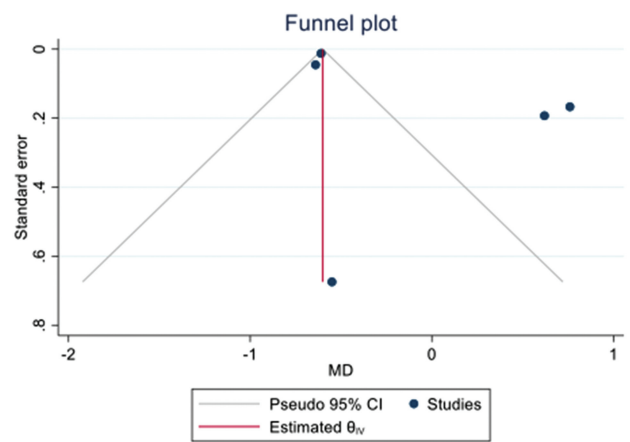

**Supplementary Fig. S3** Funnel plot asymmetry test for the efficacy of photobiomodulation therapy on clinical severity. CI, confidence interval; MD, mean difference.

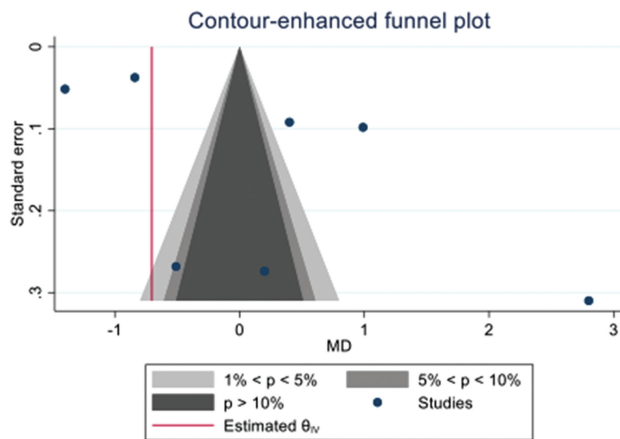

**Supplementary Fig. S2** Contour-enhanced funnel plot for the efficacy of photobiomodulation therapy on pain score (visual analog scale). MD, mean difference.

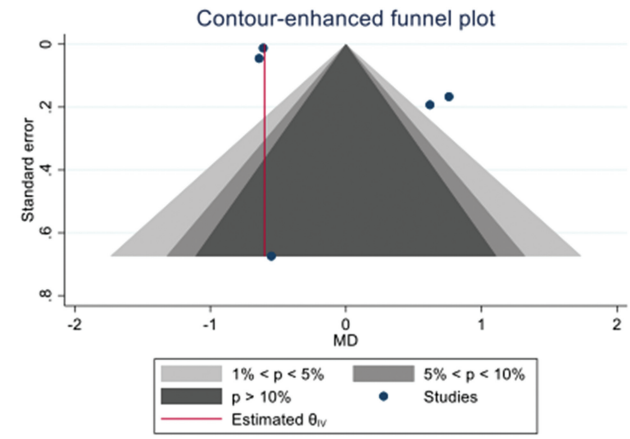

**Supplementary Fig. S4** Contour-enhanced funnel plot for the efficacy of photobiomodulation therapy on clinical severity. MD, mean difference.
